# Supplementary material for: Correction: Preclinical Assessment of Carboplatin Treatment Efficacy in Lung Cancer by 18F-ICMT-11-Positron Emission Tomography
Source: PLoS One. 2020 Jul 9;15(7):e0235804. doi: 10.1371/journal.pone.0235804 (PMC7347147; doi:10.1371/journal.pone.0235804)
Supplement: S3 Table — (XLSX) [file pone.0235804.s004.xlsx]

## Sheet: Sheet1
ICMT-11 %activity/mg protein	Normalised caspase-3 activity
10.3446	1
11.7165	1.49264
17.2144	3.3727
31.2429	13.7657
47.1547	10.9665
25.3697	1
25.4537	1.49264
28.8125	3.3727
47.1546	13.7657
79.4127	10.9665
11.6981	1
10.8645	2.8541
12.7512	14.0746
21.0345
65.5033	12.5496
12.1788	1
12.734	2.32037
15.9235	5.6695
25.7032	15.8093
32.4166	9.71448
